# Supplementary material for: Straw-sheaf-like terbium-based coordination polymer architectures: microwave-assisted synthesis and their application as selective luminescent probes for heavy metal ions
Source: Royal Society of Chemistry journal article supplement (doi:10.1039/c4nj02138j), 2015-01-01
Supplement: c4nj02138j1.pdf [file c4nj02138j1.pdf]

## Supporting information

### **Straw-sheaf-like terbium-based coordination polymer architectures: Microwave-assisted synthesis and their application as selective luminescent probes for heavy metal ions**

Mengmeng Shi, Zeng Chenghui, Lei Wang, Zhiwen Nie, Yongxia Zhao,

Shengliang Zhong\*

Table S1 summarizes crystal structures, morphologies and sizes of the Ln-H<sub>4</sub>BTC

| Ln-H <sub>4</sub> BTC | microwave<br>power<br>[W] | time<br>[min] | morphology  | middle<br>diameter<br>[μm] | length<br>[μm] |
|-----------------------|---------------------------|---------------|-------------|----------------------------|----------------|
| La                    | 80                        | 15            | rod-sheaf   | 15-25                      | 50-70          |
| Ce                    | 80                        | 15            | rod-sheaf   | 3-6                        | 15-35          |
| Pr                    | 80                        | 15            | rod-sheaf   | 10-15                      | 60-90          |
| Nd                    | 80                        | 15            | rod-sheaf   | 10-15                      | 35-45          |
| Sm                    | 80                        | 15            | straw-sheaf | 5-8                        | 50-90          |
| Eu                    | 80                        | 15            | straw-sheaf | 4-7                        | 50-70          |
| Gd                    | 80                        | 15            | straw-sheaf | 4-6                        | 40-70          |
| Tb                    | 80                        | 15            | straw-sheaf | 5-8                        | 70-90          |
| Dy                    | 80                        | 15            | straw-sheaf | 6-9                        | 70-90          |
| Ho                    | 80                        | 15            | straw-sheaf | 5-8                        | 60-80          |
| Er                    | 80                        | 15            | straw-sheaf | 6-8                        | 60-90          |
| Tm                    | 80                        | 15            | rod-sheaf   | 8-15                       | 45-50          |
| Yb                    | 80                        | 15            | rod-sheaf   | 10-20                      | 30-50          |
| Lu                    | 80                        | 15            | straw-sheaf | 7-10                       | 50-80          |

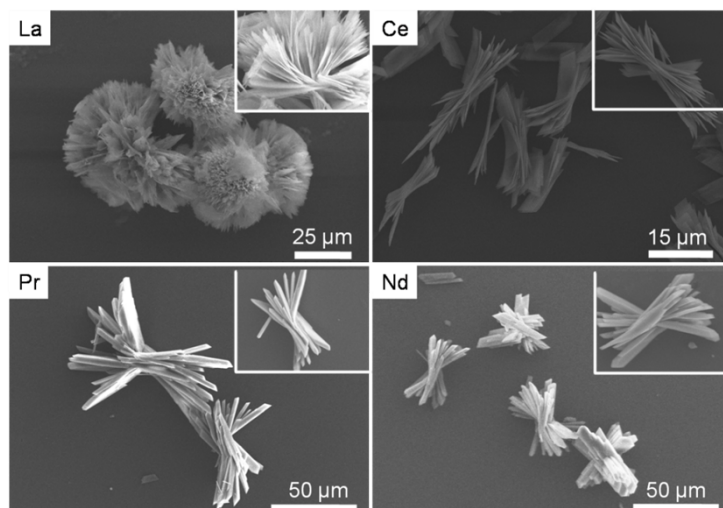

**Fig. S1 SEM images of the Ln-H<sub>4</sub>BTC (Ln = La, Ce, Pr, Nd).**

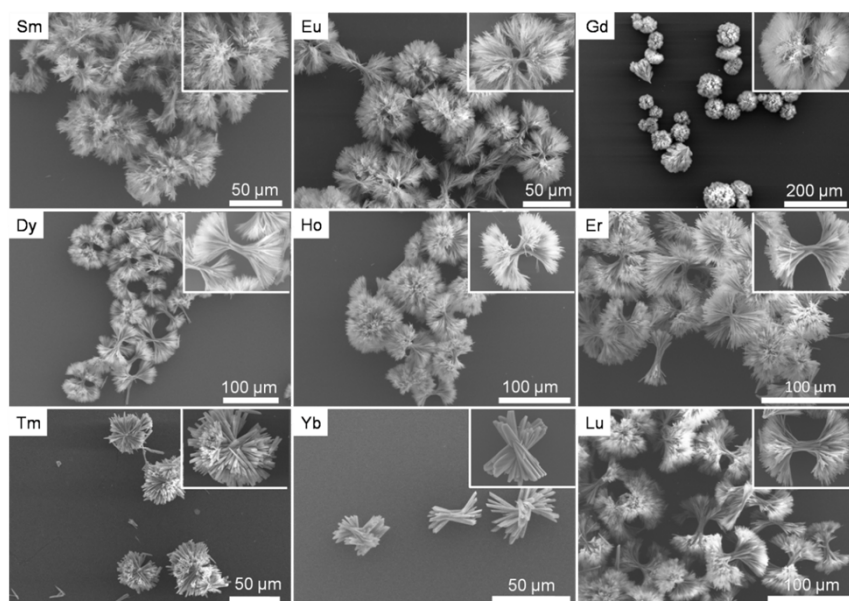

**Fig. S2 SEM images of the Ln-H<sub>4</sub>BTC (Ln = Sm, Eu, Gd, Dy, Ho, Er, Tm, Yb, Lu).**

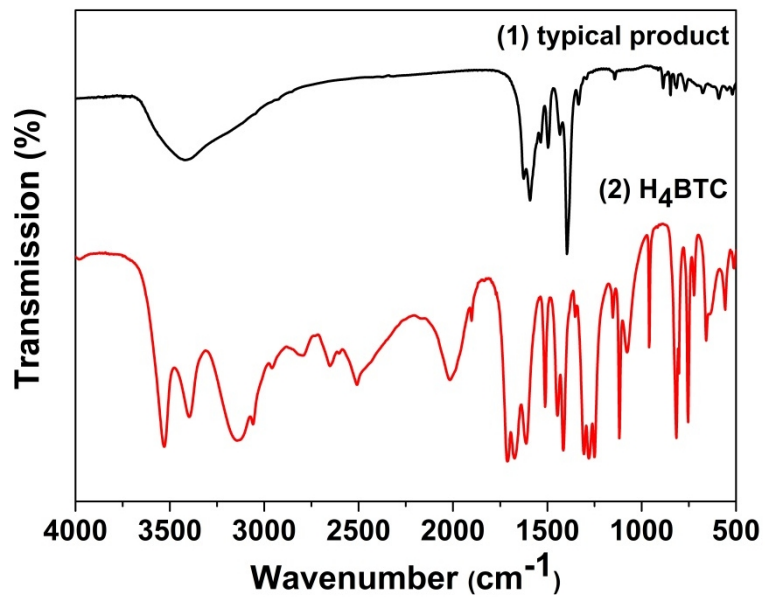

Fig. S3 FT-IR spectra of the typical product (1) and H<sub>4</sub>BTC (2).

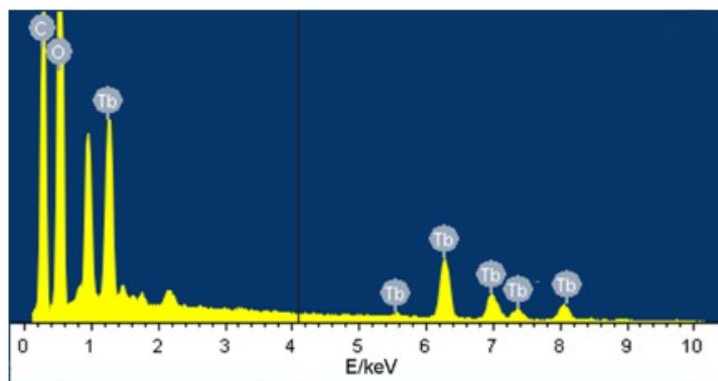

Fig. S4 EDX spectrum of the typical product.

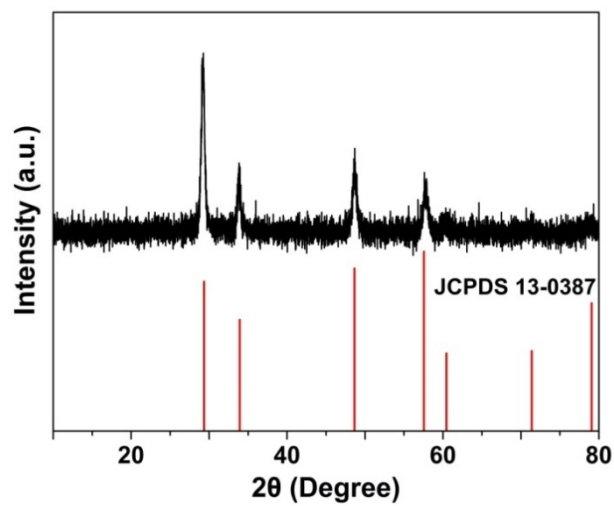

Fig. S5 XRD pattern of the product prepared after calcining the typical product at 600 °C for 4 h.

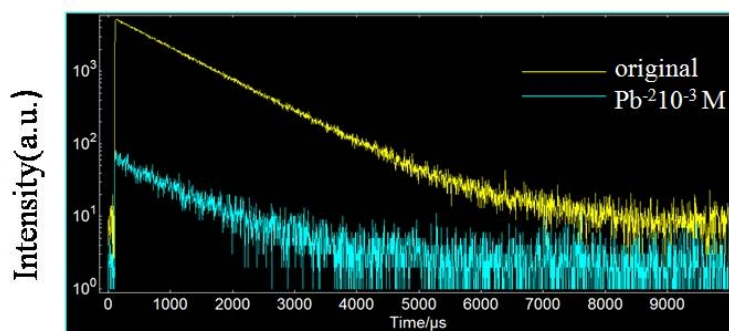

Fig. S6 Comparison of the luminescence lifetime studies of  $Tb^{3+}$  in original suspension and  $Pb^{2+} 10^{-3} M$  aqueous solution.
